# Supplementary material
Source: HighWire-hosted journal article supplement (https://cmaj.ca/highwire/filestream/81736/field_highwire_adjunct_files/4/202392-res-5-at.pdf)
Supplement: 202392-res-5-at.pdf [file 202392-res-5-at.pdf]

**Supplementary Appendix 5: Unweighted and Unadjusted Absolute Risk Differences for Outcomes**

|                       | Events in non-users (%) | Events in cannabis-users (%) | Absolute risk difference<br>(Cannabis-user – non-user) |
|-----------------------|-------------------------|------------------------------|--------------------------------------------------------|
| Myocardial infarction | 240/28,563 (0.84)       | 61/4,610 (1.32)              | 0.48 (0.16 to 0.85)                                    |
| Skin Cancer           | 356/28,187 (1.26)       | 54/4,551 (1.19)              | -0.07 (-0.39 to 0.29)                                  |
| Blindness             | 769/27,780 (2.77)       | 168/4,436 (3.79)             | 0.90 (0.4 to 1.6)                                      |
